# Supplementary material for: Rapid method to screen biomaterial angiogenesis in vivo using fluorescence imaging in mice
Source: Royal Society of Chemistry journal article supplement (doi:10.1039/d4bm00626g), 2024-01-01
Supplement: d4bm00626g1.pdf [file d4bm00626g1.pdf]

## Supplementary Information

### Supplementary Tables

**Supplementary Table 1.** List of MDPs used.

| Name           | Sequence                                             | Peptide Domains                                                               |
|----------------|------------------------------------------------------|-------------------------------------------------------------------------------|
| K <sub>2</sub> | Ac-KKSLSLSLSLSLSLKK-CONH <sub>2</sub>                | = charged<br>= amphiphilic<br>= MMP-2 cleavable<br>= adhesion<br>= VEGF mimic |
| E <sub>2</sub> | Ac-EESSLSLSLSLSLSL-EE-CONH <sub>2</sub>              |                                                                               |
| SLac           | Ac-KSLSLSLRGSLSLSLKGRGDS-CONH <sub>2</sub>           |                                                                               |
| SLanc          | Ac-KSLSLSLRGSLSLSLKGLTWQELYQLKYKGI-CONH <sub>2</sub> |                                                                               |

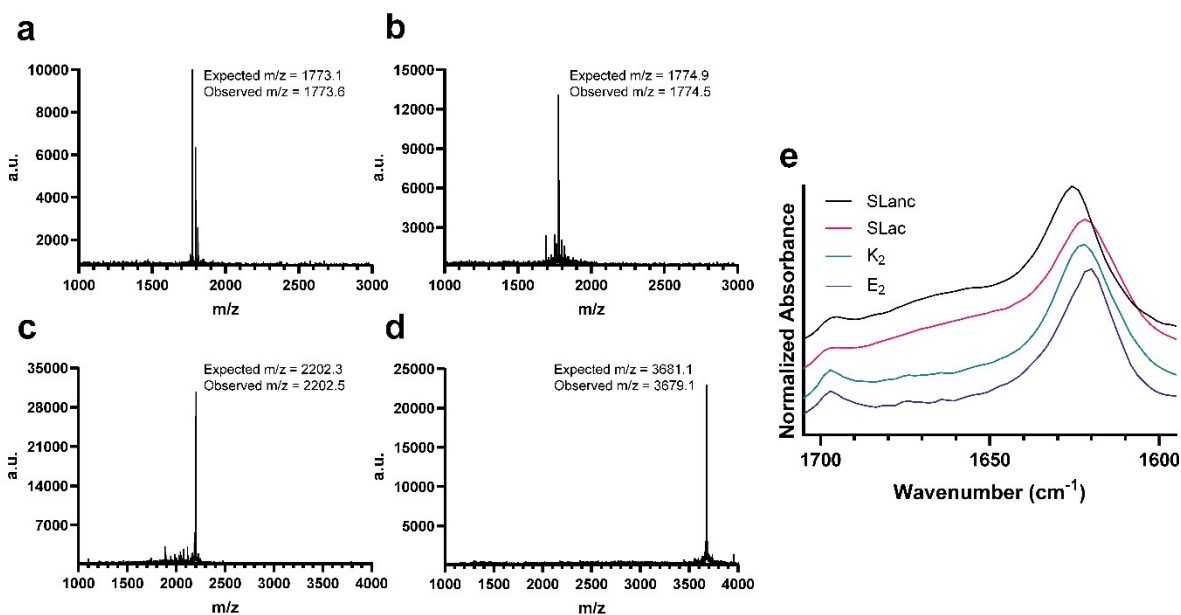

**Supplementary Figure 1.** MALDI-TOF spectra of a) K<sub>2</sub>, b) E<sub>2</sub>, c) SLac, d) SLanc, and e) FTIR spectra of all four peptides.

### Supplementary Figures

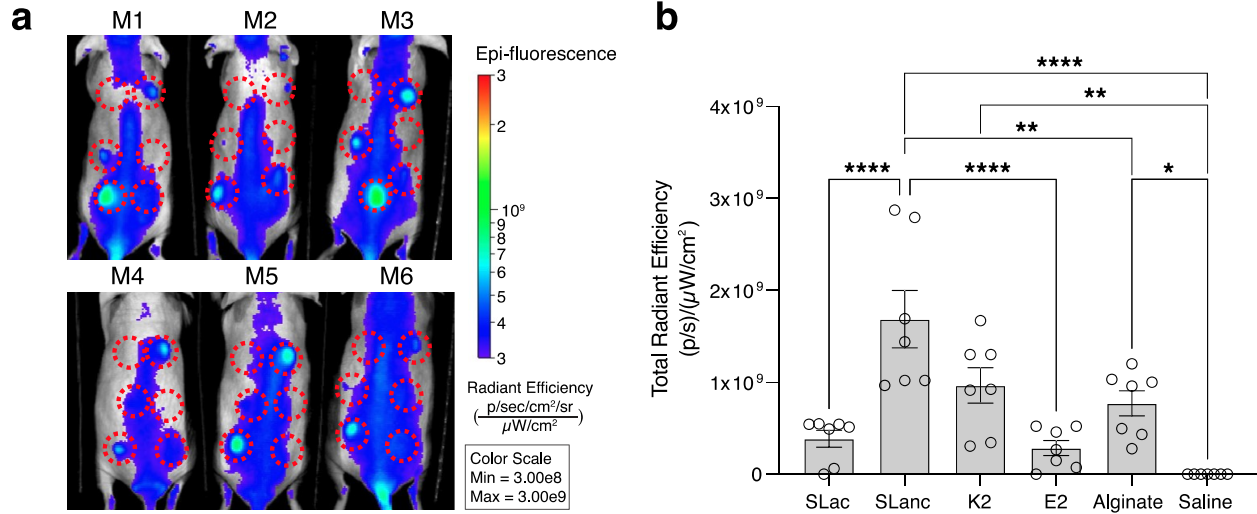

**Supplementary Figure 2. a)** IVIS imaging of 6 different fomulations (Left; Saline, SLac, SLanc, Right: K2, E2, Alginate) after 14 days of bolus injections. **b)** Quantification of florescence intensity at day 14. One-way ANOVA with Bonferroni correction ( $****P < 0.0001$ ,  $***P < 0.0002$ ,  $**P < 0.002$ ,  $*P < 0.033$ ).

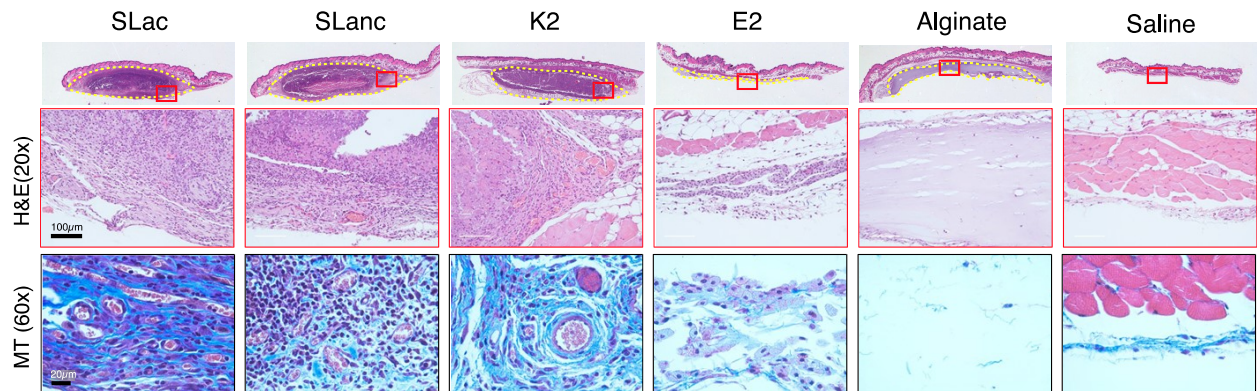

**Supplementary Figure 3.** Histology analysis of 6 different fomulations at day 7; H&E staining (Top) and Masson's trichrome staining (Bottom).

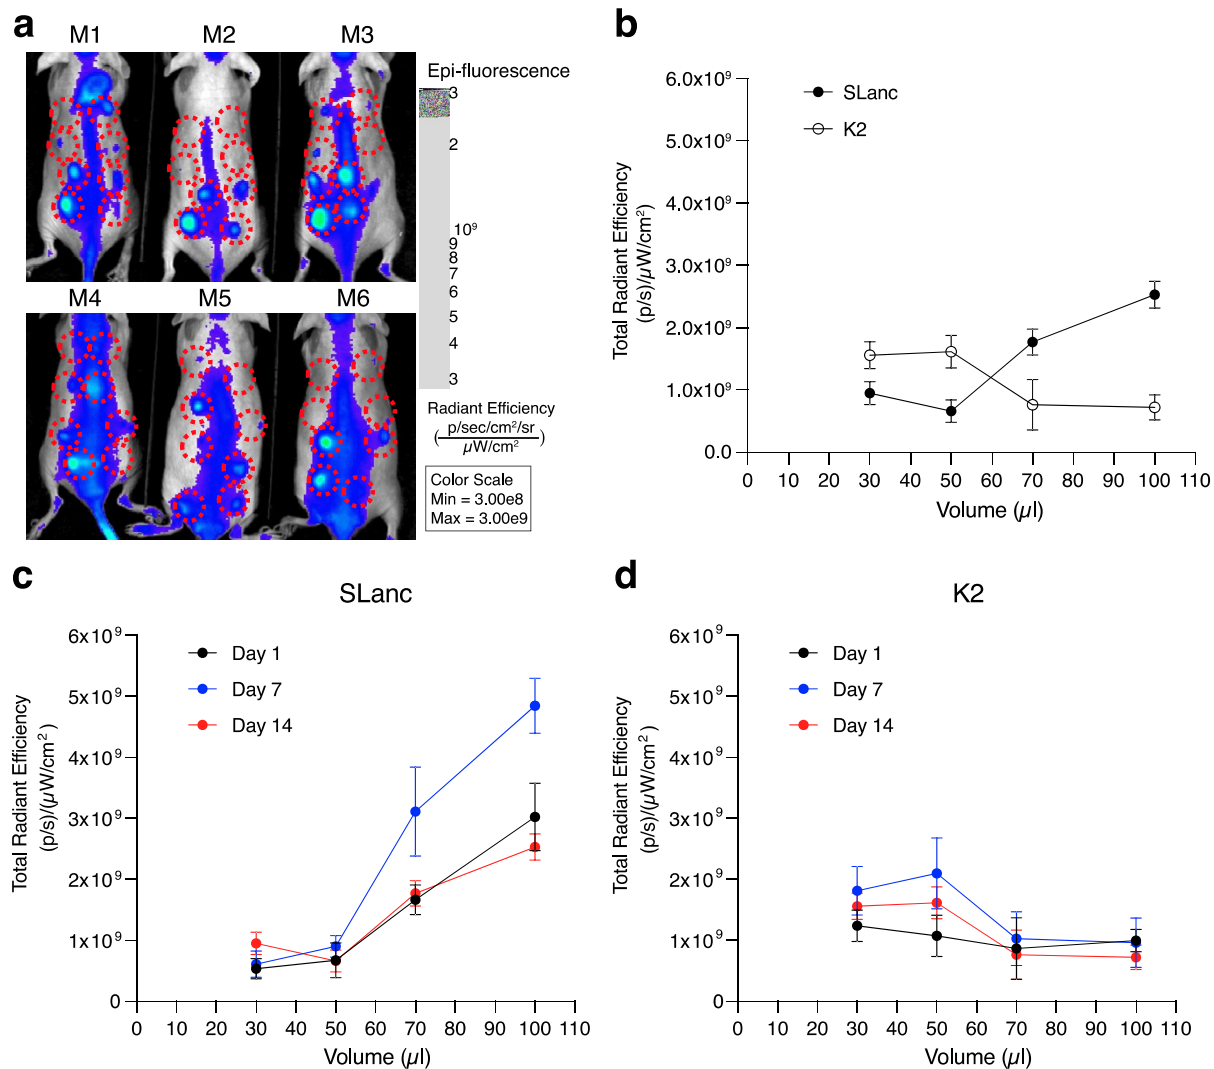

**Supplementary Figure 4. a)** IVIS imaging of SLanc and K2 with different bolus volume (Left; SLanc, Right; K2) after 14 days of bolus injections. **b)** Quantification of fluorescence intensity at day 14. **c-d)** Quantification of fluorescence intensity over time; **c)** SLanc and **d)** K2 at day 1, 7, and 14.

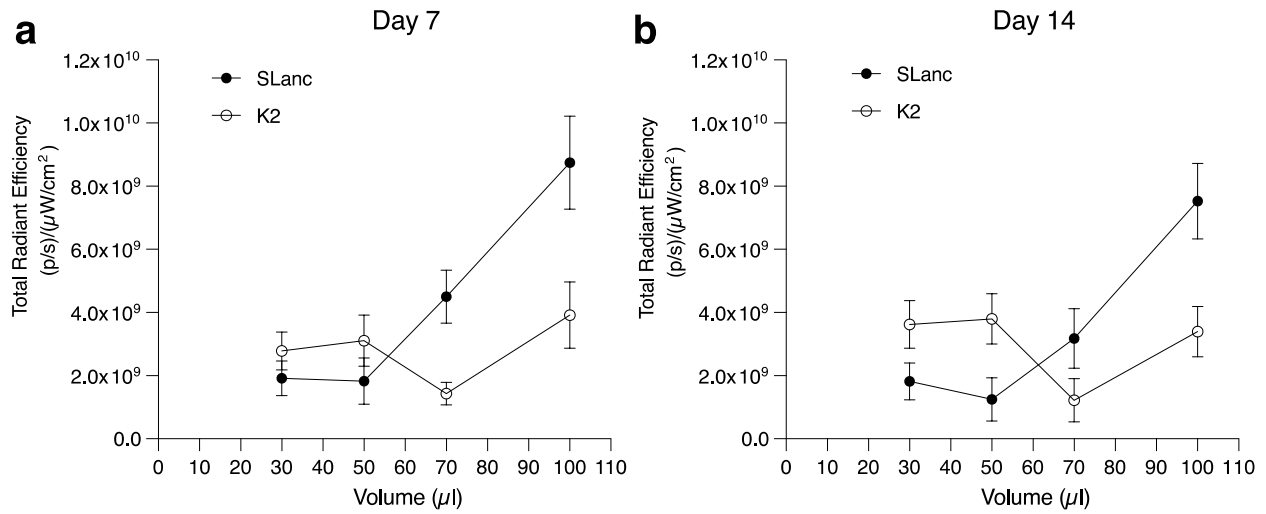

**Supplementary Figure 5.** IVIS analysis at day 7 **(a)** and day 14 **(b)** after SLanc and K2 bolus injections. AngioSense 680 probe was used to determine angiogenesis levels.

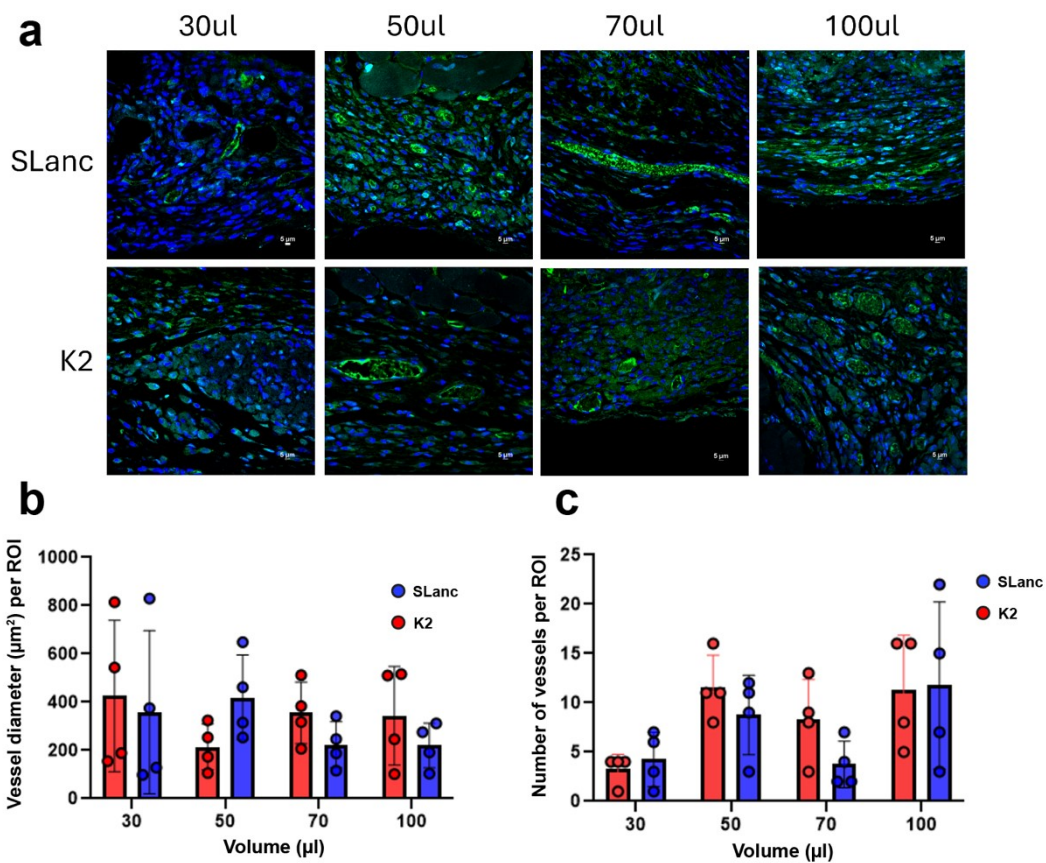

**Supplementary Figure 6. a)** Immunofluorescence microscopy of SLanc and K2 pro-angiogenic peptides after 14 days in subcutaneous space demonstrating presence of CD31 positive endothelial cells (green) with nestin (light blue), and DAPI (dark blue). Scale bar = 5 μm. **b-c)** Ex-vivo quantification of blood vessel diameter **(b)** and number **(c)** between groups after 14 days.

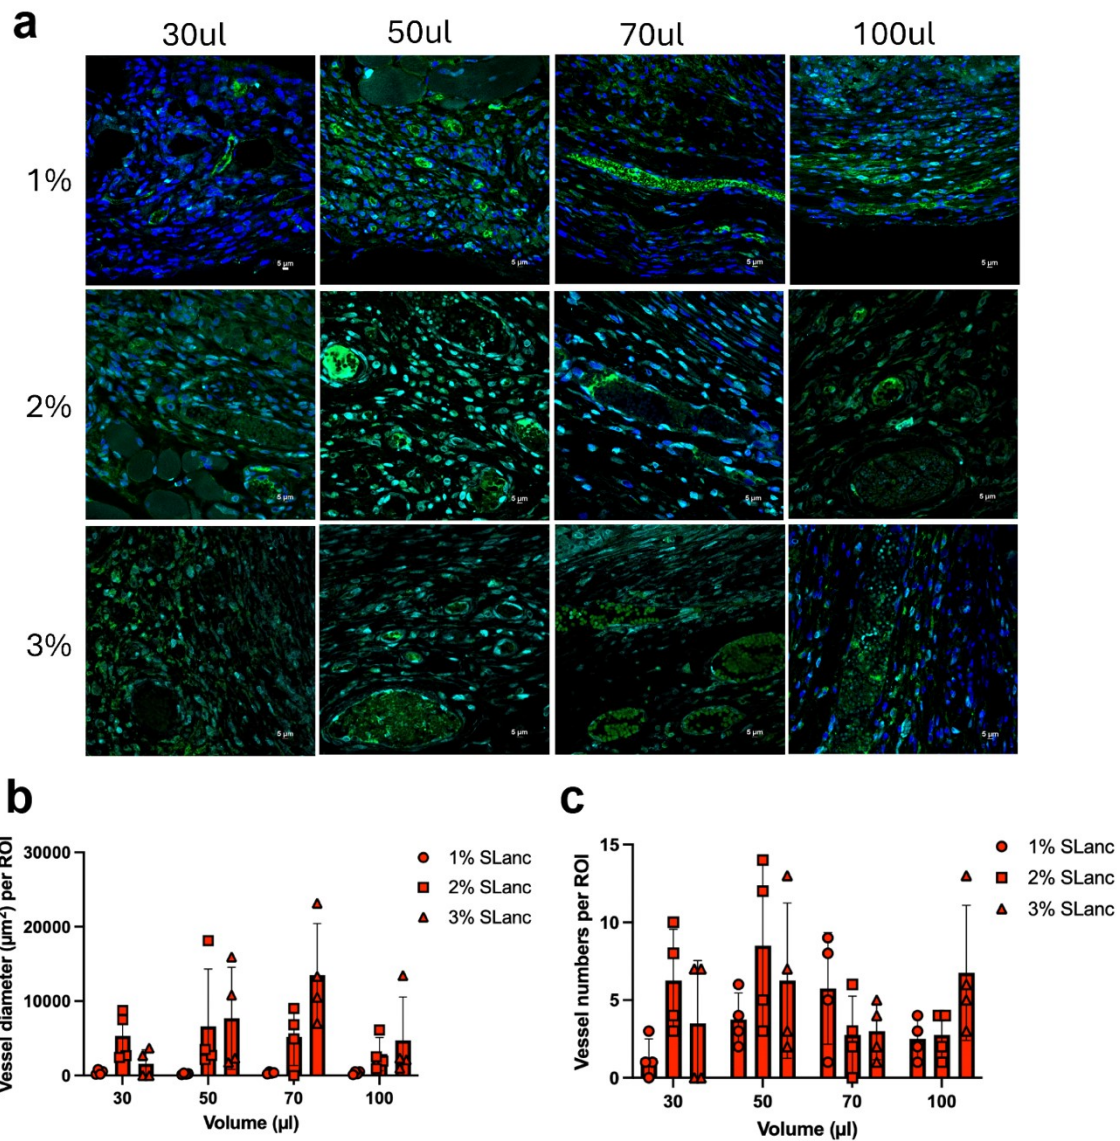

**Supplementary Figure 7. a)** Immunofluorescence microscopy of SLanc at 1, 2, and 3% concentrations after 14 days in subcutaneous space demonstrating presence of CD31 positive endothelial cells (green) with nestin (light blue), and DAPI (dark blue). Scale bar = 5  $\mu\text{m}$ . **b-c)** Ex-vivo quantification of blood vessel diameter (**b**) and number (**c**) between SLanc groups at different concentrations after 14 days.
